# Supplementary material for: Recruiting Diverse Smokers: Enrollment Yields and Cost
Source: MDPI journal article supplement (doi:10.3390/ijerph13121251), 2016-12-16

# Supplementary Materials: Recruiting Diverse Smokers: Enrollment Yields and Cost

Kaitlyn E. Brodar, Marissa G. Hall, Eboneé N. Butler, Humberto Parada, Al Stein-Seroussi, Sean Hanley and Noel T. Brewer

**DO YOU SMOKE?**

Would you like to be in a research study about health warnings on cigarette packs? To start this study, you must be 18 or older and smoke cigarettes. This study will not ask you to quit smoking. You would come to our office in Chapel Hill several times over the course of a month.

You can receive up to \$185 in cash.

**Interested?** Visit [www.cigstudyNC.org](http://www.cigstudyNC.org) or call 919-265-2628.

CIGARETTE LABEL STUDY THE UNIVERSITY of NORTH CAROLINA at CHAPEL HILL PIRE

UNC Study 13-2861

**Figure S1.** Recruitment advertisement. Note: Exact wording varied slightly depending on recruitment method.

**Table S1.** Recruitment method for screened, eligible, and enrolled participants.

| Recruitment Method   | %        |          |          |
|----------------------|----------|----------|----------|
|                      | Screened | Eligible | Enrolled |
| <i>n</i>             | 6732     | 5731     | 2149     |
| Interpersonal        |          |          |          |
| In-person recruiting | 4.3      | 4.2      | 5.4      |
| Word of mouth        | 14.3     | 14.4     | 22.9     |
| Online               |          |          |          |
| Craigslist           | 31.9     | 32.4     | 28.0     |
| Facebook ad          | 26.8     | 25.8     | 15.6     |
| Email listserv       | 2.1      | 1.9      | 1.7      |
| Other online         | 1.3      | 1.2      | 0.7      |
| Other Media          |          |          |          |
| Flyer/postcard       | 9.4      | 9.7      | 13.9     |
| Bus ad               | 3.5      | 3.7      | 4.4      |
| Newspaper ad         | 2.2      | 2.4      | 2.6      |
| Roadside sign        | 1.7      | 1.7      | 1.7      |
| Other                | 0.7      | 0.6      | 0.8      |
| Missing              | 1.9      | 2.0      | 2.4      |

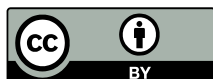

Supplement: s1 [file s1]
